# Supplementary material for: Age at Natural Menopause in Women Living with HIV: A Cross-Sectional Study Comparing Self-Reported and Biochemical Data
Source: Viruses. 2023 Apr 26;15(5):1058. doi: 10.3390/v15051058 (PMC10221766; doi:10.3390/v15051058)
Supplement: Supplementary file 1 [file viruses-15-01058-s001.zip › viruses-2325404-supplementary.pdf]

## Appendix

**Table S1.** Odds of early menopause (<45 years old) based on self-report with biochemical confirmation of menopause status among women living with HIV (14/83) and HIV-negative women (15/92) in the CARMA-ENDO and BCC3 cohorts

|                                                  | Unadjusted OR<br>(95% CI)  | <i>p</i> -value | Adjusted OR (95%<br>CI) | <i>p</i> -value |
|--------------------------------------------------|----------------------------|-----------------|-------------------------|-----------------|
| <b>HIV status</b> (ref: HIV-negative)            | 1.04 (0.47 to 2.32)        | 0.92            | 1.35 (0.47 to 3.88)     | 0.57            |
| <b>Income</b> (ref: ≥20,000 CAD/year)            | 1.19 (0.52 to 2.69)        | 0.68            | 0.63 (0.20 to 1.87)     | 0.41            |
| <b>Parity</b> (per increase in one birth)        | 1.03 (0.78 to 1.33)        | 0.83            | 0.97 (0.69 to 1.34)     | 0.87            |
| <b>BMI*</b> (per one kg/m <sup>2</sup> increase) | 0.99 (0.93 to 1.05)        | 0.75            | 0.98 (0.91 to 1.05)     | 0.53            |
| <b>Hepatitis C infection</b> (ref: never)        | 1.29 (0.55 to 2.91)        | 0.55            | 0.39 (0.09 to 1.52)     | 0.18            |
| <b>Smoking</b> (ref: never)                      |                            |                 |                         |                 |
| Past                                             | 1.50 (0.46 to 8.57)        | 0.48            | 0.61 (0.11 to 2.64)     | 0.53            |
| Current                                          | <b>3.20 (1.28 to 8.57)</b> | <b>0.02</b>     | 2.66 (0.64 to 11.0)     | 0.17            |
| <b>Substance use<sup>†</sup></b> (ref: never)    | <b>2.95 (1.31 to 6.76)</b> | <b>0.009</b>    | 3.60 (0.97 to 14.5)     | 0.06            |
| <b>Ethnicity</b> (ref: White)                    |                            |                 |                         |                 |
| Non-White                                        | 1.17 (0.52 to 2.63)        | 0.71            |                         |                 |
| <b>Age at menarche</b> (per one year increase)   | 1.15 (0.89 to 1.48)        | 0.29            |                         |                 |

Biochemically confirmed age at menopause was determined based on the age at the last menstrual period and follicle stimulating hormone levels. \*BMI=body mass index; †Substance use=history of opioid, crack/cocaine, and/or methamphetamine use.

**Table S2.** Factors associated with self-report plus biochemically confirmed age at menopause by median regression in women living with HIV (n=66) and HIV-negative women (n=85) in the CARMA-ENDO and BCC3 cohorts who have never used opioids

|                                                  | Unadjusted $\beta$ (95%<br>CI) | <i>p</i> -value  | Adjusted $\beta$ (95% CI)     | <i>p</i> -<br>value |
|--------------------------------------------------|--------------------------------|------------------|-------------------------------|---------------------|
| <b>HIV status</b> (ref: HIV-negative)            | -1.00 (-3.04 to 1.04)          | 0.33             | 0.93 (-1.17 to 3.04)          | 0.38                |
| <b>Income</b> (ref: ≥20,000 CAD/year)            | -2.00 (-4.47 to 0.47)          | 0.11             | 0.41 (-1.53 to 2.36)          | 0.68                |
| <b>Parity</b> (per increase in one birth)        | 0.00 (-0.71 to 0.71)           | 1.00             | -0.08 (-0.74 to 0.59)         | 0.82                |
| <b>BMI*</b> (per one kg/m <sup>2</sup> increase) | 0.00 (-0.10 to 0.10)           | 1.00             | -0.06 (-0.19 to 0.07)         | 0.37                |
| <b>Hepatitis C infection</b> (ref: never)        | -2.00 (-0.45 to 0.45)          | 0.11             | -0.40 (-3.04 to 2.25)         | 0.77                |
| <b>Smoking</b> (ref: never)                      |                                |                  |                               |                     |
| Past                                             | 0.00 (-1.66 to 1.66)           | 1.00             | -0.87 (-3.12 to 1.39)         | 0.45                |
| Current                                          | <b>-3.00 (-4.95 to -1.05)</b>  | <b>&lt;0.001</b> | <b>-2.77 (-5.14 to -0.41)</b> | <b>0.02</b>         |

|                                                |                               |             |                       |             |
|------------------------------------------------|-------------------------------|-------------|-----------------------|-------------|
| <b>Substance use</b> <sup>†</sup> (ref: never) | <b>-3.00 (-5.80 to -0.20)</b> | <b>0.04</b> | -1.11 (-4.12 to 1.90) | <b>0.47</b> |
| <b>Age at menarche</b> (per one year increase) | 0.00 (-0.51 to 0.51)          | 1.00        | -0.06 (-0.67 to 0.55) | <b>0.85</b> |
| <b>Ethnicity</b> (ref: White)                  |                               |             |                       |             |
| Non-White                                      | -1.00 (-2.88 to 0.88)         | <b>0.29</b> |                       |             |

Biochemically confirmed age at menopause was determined based on the age at the last menstrual period and follicle stimulating hormone levels. \*BMI=body mass index; †Substance use=history of crack/cocaine or methamphetamine use.

**Table S3.** Association between HIV-related variables and self-report with biochemically confirmed age at menopause by median regression among women living with HIV (n=66) who have never used opioids in the CARMA-ENDO and BCC3 cohorts

|                                                               | Unadjusted $\beta$ (95% CI) | <i>p</i> -value | Adjusted $\beta$ (95% CI) | <i>p</i> -value |
|---------------------------------------------------------------|-----------------------------|-----------------|---------------------------|-----------------|
| <b>Nadir CD4 count</b> (ref: $\geq 200$ cells/ml)             |                             |                 |                           |                 |
| <200 cells/ml                                                 | 1.00 (-6.59 to 8.59)        | <b>0.79</b>     | 3.00 (-3.84 to 9.84)      | <b>0.37</b>     |
| <b>Current CD4 count</b> (ref: $\geq 500$ cells/ml)           |                             |                 |                           |                 |
| <500 cells/ml                                                 | 1.00 (-2.53 to 4.53)        | <b>0.57</b>     | 0.00 (-7.35 to 7.35)      | 1.00            |
| <b>Highest HIV viral load</b> (ref: <100,000 copies/ $\mu$ l) |                             |                 |                           |                 |
| $\geq 100,000$ copies/ml                                      | 1.00 (-1.93 to 3.93)        | <b>0.50</b>     | -1.00 (-11.3 to 9.29)     | <b>0.84</b>     |
| <b>Current viral load</b> (ref: undetectable)                 |                             |                 |                           |                 |
| Detectable                                                    | -2.00 (-8.09 to 4.09)       | <b>0.51</b>     |                           |                 |
| <b>Years lived with HIV</b> (per on year increase)            | 0.08 (-0.09 to 0.25)        | <b>0.37</b>     |                           |                 |

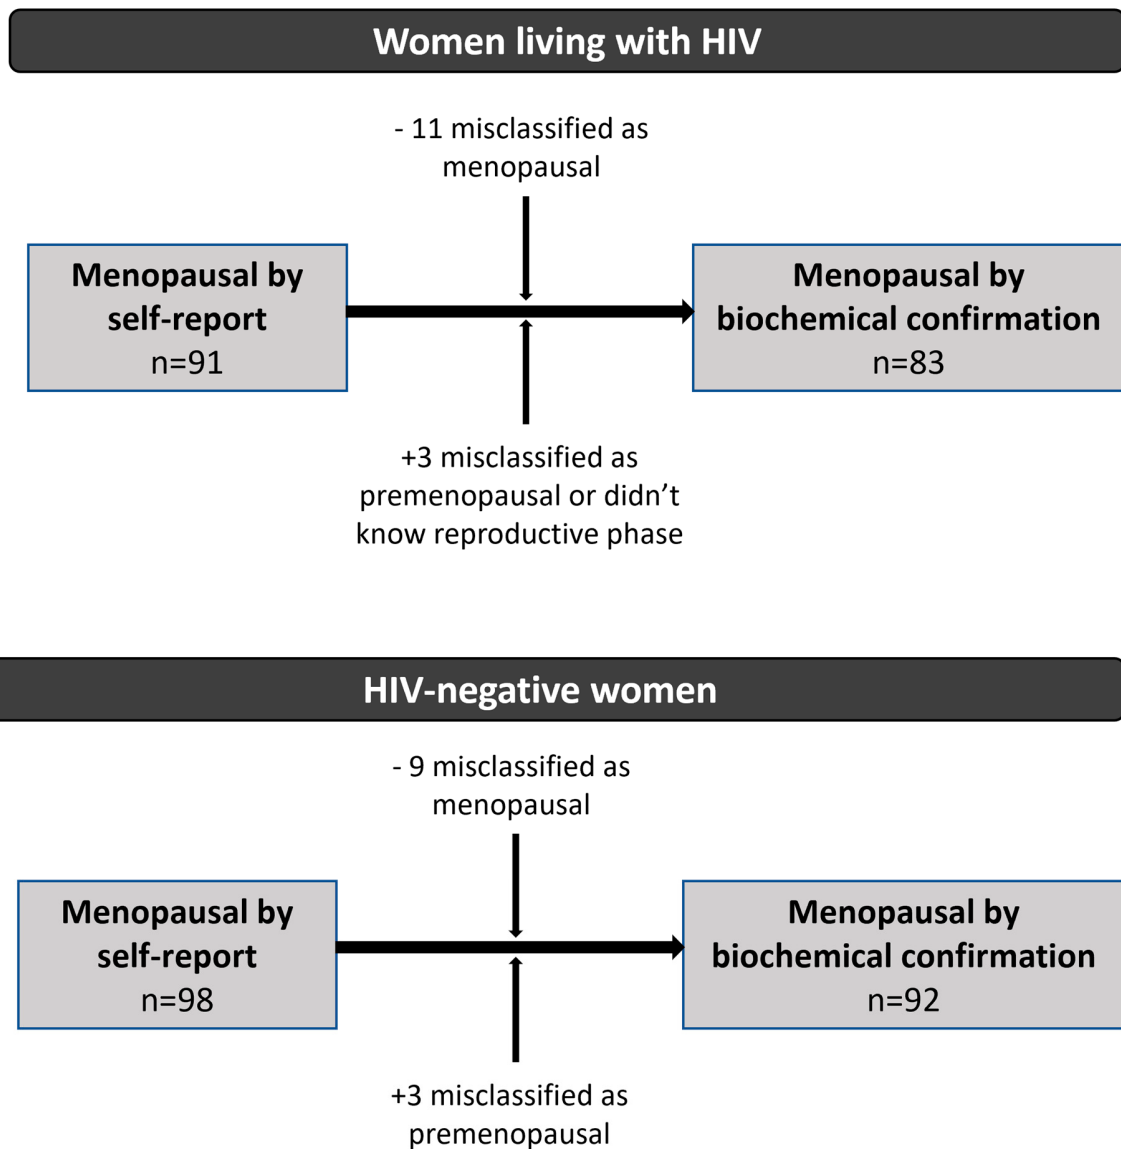

**Figure S1.** Flowchart of reproductive phase classification by self-report alone or self-report with biochemical confirmation based on follicle stimulating hormone levels
